# Supplementary material
Source: PubMed Central journal article supplement (PMC9588770)
Supplement: NIHMS1827087-supplement-Supplemental_Digital_Content_2.pdf [file NIHMS1827087-supplement-Supplemental_Digital_Content_2.pdf]

## Appendix 1. Details of ICES Health Administrative Datasets

| <b>Data source</b>                                                    | <b>Construct</b>                                                            | <b>Coding structure</b>                                                                                      | <b>Inception</b> |
|-----------------------------------------------------------------------|-----------------------------------------------------------------------------|--------------------------------------------------------------------------------------------------------------|------------------|
| Canadian Institute for Health Information Discharge Abstract Database | Hospital admissions, including those for maternal-newborn records (MOMBABY) | Canadian Coding Standards for the International Classification of Diseases and Related Health Problems codes | 1988             |
| National Ambulatory Care Reporting System                             | Emergency department visits                                                 | Canadian Coding Standards for the International Classification of Diseases and Related Health Problems codes | 2002             |
| Ontario Health Insurance Database                                     | Outpatient physician visits                                                 | Physician billing codes                                                                                      | 1991             |
| Ontario Mental Health Reporting System                                | Psychiatric hospital admissions                                             | Diagnostic and Statistical Manual of Mental Disorders                                                        | 2005             |
| Ontario Registrar General Database                                    | Deaths                                                                      | N/A                                                                                                          | 1990             |
| Registered Persons Database                                           | Sociodemographic data, including postal code for linkage with Census        | N/A                                                                                                          | 1991             |

Brown HK, Saunders N, Chen S, Leslie K, Vigod SN, Fung K, et al. Disability and interpersonal violence in the perinatal period. *Obstet Gynecol* 2022;140.

The authors provided this information as a supplement to their article.

©2022 American College of Obstetricians and Gynecologists.

## Appendix 2. ICD-10 Codes for the Identification of Interpersonal Violence<sup>1</sup>

| Type of violence | ICD-10 code*                                                                               | Description                                                                                                                      |
|------------------|--------------------------------------------------------------------------------------------|----------------------------------------------------------------------------------------------------------------------------------|
| Physical         | T74.1                                                                                      | Physical abuse                                                                                                                   |
|                  | X85                                                                                        | Assault by drugs, medicaments and biological substances                                                                          |
|                  | X86                                                                                        | Assault by corrosive substance                                                                                                   |
|                  | X87                                                                                        | Assault by pesticides                                                                                                            |
|                  | X88                                                                                        | Assault by gases and vapours                                                                                                     |
|                  | X89                                                                                        | Assault by other specified chemicals and noxious substances                                                                      |
|                  | X90                                                                                        | Assault by unspecified chemical or noxious substance                                                                             |
|                  | X91                                                                                        | Assault by hanging, strangulation and suffocation                                                                                |
|                  | X92                                                                                        | Assault by drowning and submersion                                                                                               |
|                  | X93                                                                                        | Assault by handgun discharge                                                                                                     |
|                  | X94                                                                                        | Assault by rifle, shotgun and larger firearm discharge                                                                           |
|                  | X95                                                                                        | Assault by other and unspecified firearm discharge                                                                               |
|                  | X96                                                                                        | Assault by explosive material                                                                                                    |
|                  | X97                                                                                        | Assault by smoke, fire and flames                                                                                                |
|                  | X98                                                                                        | Assault by steam, hot vapours and hot objects                                                                                    |
|                  | X99                                                                                        | Assault by sharp object                                                                                                          |
|                  | Y00                                                                                        | Assault by blunt object                                                                                                          |
|                  | Y01                                                                                        | Assault by pushing from high place                                                                                               |
|                  | Y02                                                                                        | Assault by pushing or placing victim before moving object                                                                        |
|                  | Y03                                                                                        | Assault by crashing of motor vehicle                                                                                             |
|                  | Y04                                                                                        | Assault by bodily force                                                                                                          |
|                  | Y08                                                                                        | Assault by other specified means                                                                                                 |
|                  | Y09                                                                                        | Assault by unspecified means                                                                                                     |
|                  | Y87.1                                                                                      | Sequelae of assault                                                                                                              |
|                  | Z04.58                                                                                     | Examination and observation following other inflicted injury                                                                     |
| Z61.6            | Problems related to alleged physical abuse of child (15 to 18 <sup>th</sup> birthday only) |                                                                                                                                  |
| Sexual           | T74.2                                                                                      | Sexual abuse                                                                                                                     |
|                  | Y05                                                                                        | Sexual assault by bodily force                                                                                                   |
|                  | Z04.4                                                                                      | Examination and observation following alleged rape and seduction                                                                 |
|                  | Z04.50                                                                                     | Examination and observation following alleged adult sexual and physical abuse                                                    |
|                  | Z04.51                                                                                     | Examination and observation following alleged child sexual and physical abuse (15 to 18 <sup>th</sup> birthday only)             |
|                  | Z61.4                                                                                      | Problems related to alleged sexual abuse of child by person within primary support group (15 to 18 <sup>th</sup> birthday only)  |
|                  | Z61.5                                                                                      | Problems related to alleged sexual abuse of child by person outside primary support group (15 to 18 <sup>th</sup> birthday only) |
|                  | Z70.2                                                                                      | Counselling related to sexual behaviour and orientation of third party                                                           |
|                  | Z70.3                                                                                      | Counselling related to combined concerns regarding sexual attitude, behaviour and orientation                                    |
|                  | Psychological                                                                              | T73                                                                                                                              |
| T74.0            |                                                                                            | Neglect or abandonment                                                                                                           |
| T74.3            |                                                                                            | Psychological abuse                                                                                                              |
| T74.8            |                                                                                            | Other maltreatment syndromes                                                                                                     |
| T74.9            |                                                                                            | Maltreatment syndrome, unspecified                                                                                               |
| Y06              |                                                                                            | Neglect and abandonment                                                                                                          |
| Y07              |                                                                                            | Other maltreatment syndromes                                                                                                     |

Brown HK, Saunders N, Chen S, Leslie K, Vigod SN, Fung K, et al. Disability and interpersonal violence in the perinatal period. *Obstet Gynecol* 2022;140.

The authors provided this information as a supplement to their article.

©2022 American College of Obstetricians and Gynecologists.

| <b>Type of violence</b> | <b>ICD-10 code*</b> | <b>Description</b>                                                                 |
|-------------------------|---------------------|------------------------------------------------------------------------------------|
| Physical                | T74.1               | Physical abuse                                                                     |
|                         | Z62.9               | Problems related to upbringing, unspecified (15 to 18 <sup>th</sup> birthday only) |

\* One or more of these codes was required to be present in any diagnostic field.

Brown HK, Saunders N, Chen S, Leslie K, Vigod SN, Fung K, et al. Disability and interpersonal violence in the perinatal period. *Obstet Gynecol* 2022;140.

The authors provided this information as a supplement to their article.

©2022 American College of Obstetricians and Gynecologists.

### Appendix 3. Measurement of the Covariates

| Covariate                                | Definition                                                                                                                                                                                                                     | Dataset                                                                                                                                                                                                                                                                                                                                                                                                                                                                                                                                                                                                                                                              |
|------------------------------------------|--------------------------------------------------------------------------------------------------------------------------------------------------------------------------------------------------------------------------------|----------------------------------------------------------------------------------------------------------------------------------------------------------------------------------------------------------------------------------------------------------------------------------------------------------------------------------------------------------------------------------------------------------------------------------------------------------------------------------------------------------------------------------------------------------------------------------------------------------------------------------------------------------------------|
| Age                                      | Age at conception                                                                                                                                                                                                              | MOMBABY                                                                                                                                                                                                                                                                                                                                                                                                                                                                                                                                                                                                                                                              |
| Parity                                   | Number of prior obstetrical deliveries                                                                                                                                                                                         | MOMBABY                                                                                                                                                                                                                                                                                                                                                                                                                                                                                                                                                                                                                                                              |
| Neighbourhood income quintile            | Median family income in dissemination area associated with residential postal code                                                                                                                                             | RPDB linked with Census data                                                                                                                                                                                                                                                                                                                                                                                                                                                                                                                                                                                                                                         |
| Rural residence                          | Rurality Index of Ontario, <sup>2</sup> a standard, normalized scale ranging from 0 to 100 that reflects a community's degree of rurality                                                                                      | RPDB linked with Census data                                                                                                                                                                                                                                                                                                                                                                                                                                                                                                                                                                                                                                         |
| Chronic conditions                       | Stable and unstable chronic conditions recorded in the two years before conception, where unstable conditions are more likely to have complications and are require more ongoing resources such as specialty care <sup>3</sup> | Johns Hopkins Adjusted Clinical Groups (ACG) <sup>®</sup> System version 10 applied to OHIP                                                                                                                                                                                                                                                                                                                                                                                                                                                                                                                                                                          |
| Mental illness                           | Any mood or anxiety disorder, psychotic disorder, or other mental disorder diagnosed in the two years before conception <sup>4</sup>                                                                                           | OHIP: (1) with a general practitioner/family physician with (a) a general service code (A001, A003-A008, A888, A901, A905) for diagnostic codes 295-298, 300-302, 306, 309, 311 or (b) a mental health service code (K005, K007, K623) for diagnostic codes 295-298, 300-302, 306, 309, 311 OR (2) a visit with a psychiatrist for diagnostic codes 295-298, 300-302, 306, 309, 311; CIHI-DAD/NACRS: ICD-9 295-298, 300-302, 306, 309, 311; ICD-10 F20 (excluding F20.4), F21-F25, F28-F34, F38-F43, F48.8, F48.9, F53.1, F53.0, F60-F62, F68, F69; OMHRS: DSM-IV 295-298, 300, 308.3, 309.0, 309.24, 309.28, 309.3, 309.4, 309.8, 309.9; PROV DX 1, 5, 6, 7, 15, 16 |
| Substance use disorder                   | Any addiction diagnosis related to drugs or alcohol in the two years before conception                                                                                                                                         | OHIP: (1) with a general practitioner/family physician with (a) a general service code (A001, A003-A008, A888, A901, A905) for diagnostic codes 303, 304 or (b) a mental health service code (K005, K007, K623) for diagnostic codes 303, 304 OR (2) a visit with a psychiatrist for diagnostic codes 303, 304; CIHI-DAD/NACRS: ICD-9 303-305; ICD-10 F10-F19, F55; OMHRS: DSM-IV 291 (excluding 291.82), 292 (excluding 292.85), 303, 304, 305, PROV DX 4                                                                                                                                                                                                           |
| Any history of interpersonal violence    | History of interpersonal violence in $\geq 1$ emergency department visits or hospitalizations for physical, sexual, or psychological violence any time before conception                                                       | CIHI-DAD, NACRS: T73, T74, X85-X99, Y01-Y09, Y87.1, Z04.4, Z04.50, Z04.51, Z04.58, Z61.4-Z61.6, Z62.9, Z70.2, Z70.3                                                                                                                                                                                                                                                                                                                                                                                                                                                                                                                                                  |
| Recent history of interpersonal violence | History of interpersonal violence in $\geq 1$ emergency department visits or hospitalizations for physical, sexual, or psychological violence in the two years before conception                                               | CIHI-DAD, NACRS: T73, T74, X85-X99, Y01-Y09, Y87.1, Z04.4, Z04.50, Z04.51, Z04.58, Z61.4-Z61.6, Z62.9, Z70.2, Z70.3                                                                                                                                                                                                                                                                                                                                                                                                                                                                                                                                                  |

Abbreviations: CIHI-DAD = Canadian Institute for Health Information Discharge Abstract Database, NACRS = National Ambulatory Care Reporting System, OHIP = Ontario Health Insurance Plan, OMHRS = Ontario Mental Health Reporting System, RPDB = Registered Persons Database.

Brown HK, Saunders N, Chen S, Leslie K, Vigod SN, Fung K, et al. Disability and interpersonal violence in the perinatal period. *Obstet Gynecol* 2022;140.

The authors provided this information as a supplement to their article.

©2022 American College of Obstetricians and Gynecologists.

#### Appendix 4. Standardized Differences for Table 1

|                                                                      | <b>Physical<br/>disability</b><br>(N=147 414) | <b>Sensory<br/>disability</b><br>(N=47 459) | <b>Intellectual or<br/>developmental<br/>disability</b><br>(N=2557) | <b>Multiple<br/>disabilities</b><br>(N=9598) |
|----------------------------------------------------------------------|-----------------------------------------------|---------------------------------------------|---------------------------------------------------------------------|----------------------------------------------|
| Age, years                                                           |                                               |                                             |                                                                     |                                              |
| 15-24                                                                | 0.01                                          | 0.13                                        | 0.64                                                                | 0.17                                         |
| 25-34                                                                | 0.05                                          | 0.12                                        | 0.44                                                                | 0.17                                         |
| 35-49                                                                | 0.06                                          | 0.01                                        | 0.20                                                                | 0.04                                         |
| Multiparous                                                          | 0.02                                          | 0.05                                        | 0.03                                                                | 0.02                                         |
| Neighborhood income quintile (Q)                                     |                                               |                                             |                                                                     |                                              |
| Q1 (lowest)                                                          | 0.02                                          | 0.00                                        | 0.36                                                                | 0.09                                         |
| Q2                                                                   | 0.01                                          | 0.01                                        | 0.05                                                                | 0.02                                         |
| Q3                                                                   | 0.01                                          | 0.00                                        | 0.10                                                                | 0.01                                         |
| Q4                                                                   | 0.01                                          | 0.01                                        | 0.25                                                                | 0.06                                         |
| Q5 (highest)                                                         | 0.02                                          | 0.01                                        | 0.16                                                                | 0.05                                         |
| Missing                                                              | 0.01                                          | 0.01                                        | 0.05                                                                | 0.01                                         |
| Rural region of residence                                            | 0.07                                          | 0.01                                        | 0.07                                                                | 0.07                                         |
| Missing                                                              | 0.02                                          | 0.01                                        | 0.12                                                                | 0.02                                         |
| Stable chronic conditions                                            | 0.10                                          | 0.07                                        | 0.04                                                                | 0.22                                         |
| Unstable chronic conditions                                          | 0.14                                          | 0.10                                        | 0.11                                                                | 0.29                                         |
| Mental illness                                                       | 0.19                                          | 0.13                                        | 0.69                                                                | 0.37                                         |
| Substance use disorder                                               | 0.09                                          | 0.03                                        | 0.36                                                                | 0.19                                         |
| Any history of interpersonal violence before conception              | 0.07                                          | 0.05                                        | 0.35                                                                | 0.18                                         |
| Recent history of interpersonal violence < 2 years before conception | 0.13                                          | 0.10                                        | 0.43                                                                | 0.26                                         |

Brown HK, Saunders N, Chen S, Leslie K, Vigod SN, Fung K, et al. Disability and interpersonal violence in the perinatal period. *Obstet Gynecol* 2022;140.

The authors provided this information as a supplement to their article.

©2022 American College of Obstetricians and Gynecologists.

**Appendix 5. Risk of Interpersonal Violence Between Fertilization and Up to 365 Days After Delivery, in Individuals With a Disability, Compared With Those Without Any Recognized Disability, by Timing of Violence**

| <b>Disability status</b>                               | <b>N (%)<br/>with outcome</b> | <b>Unadjusted RR<br/>(95% CI)</b> | <b>Model 1: Adjusted<br/>RR (95% CI) *</b> | <b>Model 2: Adjusted<br/>RR (95% CI) †</b> |
|--------------------------------------------------------|-------------------------------|-----------------------------------|--------------------------------------------|--------------------------------------------|
| <b>Interpersonal violence in pregnancy</b>             |                               |                                   |                                            |                                            |
| No disability (N=1 594 441)                            | 3496 (0.2)                    | [Referent]                        | [Referent]                                 | [Referent]                                 |
| Physical disability only (N=147 414)                   | 581 (0.4)                     | 1.83 (1.66-2.01)                  | 1.60 (1.45-1.75)                           | 1.45 (1.32-1.59)                           |
| Sensory disability only (N=47 459)                     | 164 (0.3)                     | 1.60 (1.36-1.89)                  | 1.27 (1.08-1.49)                           | 1.18 (1.01-1.39)                           |
| Intellectual or developmental disability only (N=2557) | 58 (2.3)                      | 10.14 (7.66-13.41)                | 2.63 (1.99-3.48)                           | 2.01 (1.52-2.65)                           |
| Multiple disabilities (N=9598)                         | 79 (0.8)                      | 3.66 (2.86-4.70)                  | 2.18 (1.71-2.77)                           | 1.73 (1.36-2.19)                           |
| <b>Interpersonal violence in the postpartum period</b> |                               |                                   |                                            |                                            |
| No disability (N=1 594 441)                            | 4221 (0.3)                    | [Referent]                        | [Referent]                                 | [Referent]                                 |
| Physical disability only (N=147 414)                   | 664 (0.5)                     | 1.69 (1.54-1.86)                  | 1.48 (1.36-1.62)                           | 1.34 (1.23-1.46)                           |
| Sensory disability only (N=47 459)                     | 167 (0.4)                     | 1.33 (1.12-1.57)                  | 1.06 (0.89-1.25)                           | 0.98 (0.83-1.16)                           |
| Intellectual or developmental disability only (N=2557) | 82 (3.2)                      | 12.37 (9.78-15.66)                | 3.12 (2.49-3.92)                           | 2.36 (1.88-2.95)                           |
| Multiple disabilities (N=9598)                         | 111 (1.2)                     | 4.72 (3.82-5.83)                  | 2.76 (2.25-3.38)                           | 2.16 (1.77-2.63)                           |

\* Model 1 adjusts for age, parity, neighbourhood income quintile, rurality, stable and unstable chronic conditions, mental illness, and substance use disorders.

† Model 2 adjusts for Model 1 variables in addition to any history of interpersonal violence.

## Appendix 6. Risk of Interpersonal Violence Between Fertilization and Up to 365 Days After Delivery, in Individuals With a Disability, Compared With Those Without Any Recognized Disability, by Type of Violence

| Disability status                                      | N (%)<br>with outcome | Unadjusted RR<br>(95% CI) | Model 1: Adjusted<br>RR (95% CI) * | Model 2: Adjusted<br>RR (95% CI) † |
|--------------------------------------------------------|-----------------------|---------------------------|------------------------------------|------------------------------------|
| <b>Physical violence</b>                               |                       |                           |                                    |                                    |
| No disability (N=1 594 441)                            | 5903 (0.4)            | [Referent]                | [Referent]                         | [Referent]                         |
| Physical disability only (N=147 414)                   | 941 (0.6)             | 1.68 (1.55-1.82)          | 1.52 (1.40-1.64)                   | 1.39 (1.29-1.50)                   |
| Sensory disability only (N=47 459)                     | 239 (0.5)             | 1.33 (1.16-1.54)          | 1.10 (0.95-1.26)                   | 1.02 (0.89-1.17)                   |
| Intellectual or developmental disability only (N=2557) | 92 (3.6)              | 9.17 (7.19-11.70)         | 2.59 (2.05-3.26)                   | 2.02 (1.60-2.54)                   |
| Multiple disabilities (N=9598)                         | 133 (1.4)             | 3.73 (3.05-4.56)          | 2.30 (1.91-2.78)                   | 1.89 (1.57-2.28)                   |
| <b>Sexual violence</b>                                 |                       |                           |                                    |                                    |
| No disability (N=1 594 441)                            | 1244 (0.1)            | [Referent]                | [Referent]                         | [Referent]                         |
| Physical disability only (N=147 414)                   | 211 (0.1)             | 1.86 (1.58-2.20)          | 1.59 (1.36-1.87)                   | 1.45 (1.23-1.70)                   |
| Sensory disability only (N=47 459)                     | 70 (0.1)              | 1.94 (1.48-2.54)          | 1.47 (1.12-1.91)                   | 1.36 (1.04-1.77)                   |
| Intellectual or developmental disability only (N=2557) | 44 (1.7)              | 22.82 (16.20-32.14)       | 4.86 (3.51-6.73)                   | 3.76 (2.72-5.21)                   |
| Multiple disabilities (N=9598)                         | 49 (0.5)              | 6.72 (4.91-9.21)          | 3.70 (2.74-4.99)                   | 2.93 (2.19-3.93)                   |
| <b>Psychological violence</b>                          |                       |                           |                                    |                                    |
| No disability (N=1 594 441)                            | 1357 (0.1)            | [Referent]                | [Referent]                         | [Referent]                         |
| Physical disability only (N=147 414)                   | 224 (0.2)             | 1.81 (1.54-2.12)          | 1.58 (1.34-1.85)                   | 1.47 (1.25-1.72)                   |
| Sensory disability only (N=47 459)                     | 39 (0.1)              | 0.99 (0.71-1.39)          | 0.81 (0.58-1.13)                   | 0.76 (0.54-1.07)                   |
| Intellectual or developmental disability only (N=2557) | 11 (0.4)              | 4.99 (2.60-9.56)          | 1.34 (0.70-2.58)                   | 1.11 (0.58-2.13)                   |
| Multiple disabilities (N=9598)                         | 30 (0.3)              | 3.87 (2.62-5.72)          | 2.31 (1.57-3.38)                   | 1.94 (1.32-2.84)                   |

\* Model 1 adjusts for age, parity, neighbourhood income quintile, rurality, stable and unstable chronic conditions, mental illness, and substance use disorders.

† Model 2 adjusts for Model 1 variables in addition to any history of interpersonal violence.

Brown HK, Saunders N, Chen S, Leslie K, Vigod SN, Fung K, et al. Disability and interpersonal violence in the perinatal period. *Obstet Gynecol* 2022;140. The authors provided this information as a supplement to their article.

©2022 American College of Obstetricians and Gynecologists.

**Appendix 7. Odds of One and Two or More Health Care Encounters for Interpersonal Violence Between Fertilization and Up to 365 days After Delivery, in Individuals With a Disability, Compared With Those Without Any Recognized Disability**

| <b>Disability status</b>                               | <b>N (%)<br/>with 1 encounter</b> | <b>N (%)<br/>with <math>\geq 2</math> encounters</b> | <b>Adjusted RR (95% CI)<br/>for 1 encounter *†</b> | <b>Adjusted RR (95% CI)<br/>for <math>\geq 2</math> encounters *†</b> |
|--------------------------------------------------------|-----------------------------------|------------------------------------------------------|----------------------------------------------------|-----------------------------------------------------------------------|
| No disability (N=1 594 441)                            | 6024 (0.4)                        | 1,450 (0.1)                                          | 1.00 (Referent)                                    | 1.00 (Referent)                                                       |
| Physical disability only (N=147 414)                   | 911 (0.6)                         | 272 (0.2)                                            | 2.04 (1.78-2.35)                                   | 1.38 (1.29-1.47)                                                      |
| Sensory disability only (N=47 459)                     | 249 (0.5)                         | 62 (0.1)                                             | 1.51 (1.16-1.97)                                   | 1.05 (0.93-1.18)                                                      |
| Intellectual or developmental disability only (N=2557) | 117 (4.6)                         | 18 (0.7)                                             | 7.06 (4.16-11.98)                                  | 2.60 (2.13-3.17)                                                      |
| Multiple disabilities (N=9598)                         | 123 (1.3)                         | 50 (0.5)                                             | 6.48 (4.87-8.62)                                   | 1.97 (1.67-2.33)                                                      |

\* Results of multinomial logistic regression with 0 violence-related health care encounters as the referent.

† Model adjusts for age, parity, neighbourhood income quintile, rurality, stable and unstable chronic conditions, mental illness, and substance use disorders, and any history of interpersonal violence.



## REFERENCES

1. Saunders N, Plumptre L, Diong C, Gandhi S, Schull M Guttman A, Paterson M. Acute care visits for assault and maltreatment before vs during the COVID-19 pandemic in Ontario, Canada. *JAMA Health Forum* 2021;2:e211983. doi:10.1001/jamahealthforum.2021.1983
2. Kralj B. Measuring “rurality” for purposes of health-care planning: an empirical measure for Ontario. *Ont Med Rev* 2000;67:33-52.
3. Johns Hopkins School of Public Health. The Johns Hopkins CGH system: Technical reference guide version 10.0. Accessed July 18, 2022.  
<https://www.hopkinsacg.org/document/acg-system-version-10-0-technical-reference-guide/>
4. Steele LS, Glazier RH, Lin E, Evans M. Using administrative data to measure ambulatory mental health service provision in primary care. *Med Care* 2004;960-965. doi: 10.1097/00005650-200410000-00004

Brown HK, Saunders N, Chen S, Leslie K, Vigod SN, Fung K, et al. Disability and interpersonal violence in the perinatal period. *Obstet Gynecol* 2022;140.

The authors provided this information as a supplement to their article.

©2022 American College of Obstetricians and Gynecologists.
